# Supplementary material for: Bipolar Ionization Did Not Reduce Airborne Bacteria in a Lecture Hall
Source: PubMed Central journal article supplement (PMC11650565; doi:10.1021/acsestair.4c00235), 2024-10-28
Supplement: ea4c00235_si_001.pdf [file ea4c00235_si_001.pdf]

## Bipolar Ionization Did Not Reduce Airborne Bacteria in a Lecture Hall

David A. Kormos<sup>1</sup>, Nishit J. Shetty<sup>1,2</sup>, Elliott T. Gall<sup>3</sup>, Aaron J. Prussin II<sup>1</sup>, Amy Pruden<sup>1</sup>, Linsey

C. Marr<sup>1\*</sup>

<sup>1</sup> Department of Civil and Environmental Engineering, Virginia Tech, Blacksburg, Virginia 24061

<sup>2</sup> Department of Civil, Environmental, and Architectural Engineering, University of Kansas, Lawrence, Kansas 66045

<sup>3</sup> Department of Mechanical and Materials Engineering, Portland State University, Portland, Oregon 97201

\*Corresponding author; [lmarr@vt.edu](mailto:lmarr@vt.edu)

### 16s rRNA qPCR protocol:

The 10 µl reaction mixture consisted of 2x SsoFast EVAgreen Supermix (BioRad Laboratories, Hercules, CA), 1 µl of DNA template, 400 nM primers, and molecular grade water. Triplicate technical replicates of each sample were amplified along with triplicate standard curves and a negative control (molecular grade water). Samples were only accepted if they had a standard deviation under 15% between technical replicates. qPCR was carried out on a CFX Connect™ Touch Real-Time PCR Detection System (BioRad Laboratories Hercules, CA). The protocol consisted of 1 cycle of 98°C for 2 min, 40 cycles of 98°C for 5 s and annealed 55°C for 5 s before a final melt curve stage with temperature ramping from 55°C to 95°C with 0.5°C per read.

**Table S1.** p-values for variables of interest by ionizer status and location. p<0.05 shown in red.

| Variable       | Ionizer status | Location | Test           |
|----------------|----------------|----------|----------------|
| Negative ions  | 0.00           | 0.48     | ANOVA          |
| Positive ions  | 0.12           | 0.16     | ANOVA          |
| Particles      | 0.02           | N/A      | ANOVA          |
| 16S rRNA genes | 0.00           | 0.88     | Kruskal-Wallis |
| CFU            | 0.01           | 0.01     | Kruskal-Wallis |
| CFU/16s rRNA   | 0.17           | 0.08     | Kruskal-Wallis |

**Table S2.** p-values of post-hoc tests differences between variables of interest.  $p < 0.05$  shown in red.

| Variable      | Back - front | Back - middle | Middle - front | OFF – ON variable | OFF - ON constant | ON - ON constant | Test  |
|---------------|--------------|---------------|----------------|-------------------|-------------------|------------------|-------|
| Negative Ions | 0.95         | 0.48          | 0.65           | 0.31              | 0.00              | 0.01             | Tukey |
| Positive Ions | 0.84         | 0.15          | 0.38           | 0.27              | 0.12              | 0.90             | Tukey |
| Particles     | N/A          | N/A           | N/A            | 0.89              | 0.05              | 0.02             | Tukey |
| 16S rRNA      | 1.00         | 1.00          | 1.00           | 0.33              | 0.00              | 0.23             | Dunn  |
| CFU           | 0.01         | 0.03          | 1.00           | 0.71              | 0.01              | 0.20             | Dunn  |
| CFU/16s rRNA  | 0.19         | 0.13          | 1.00           | 1.00              | 0.19              | 0.76             | Dunn  |

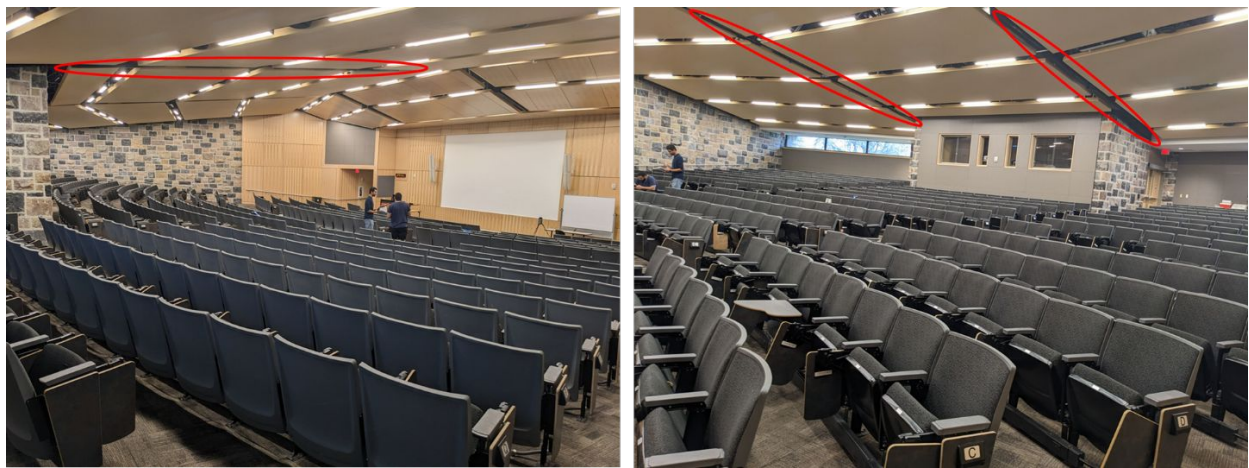

**Figure S1.** Photographs of the lecture hall from the a) back of the room and b) front of the room. Ceiling vents/diffusers that are visible are circled in red.

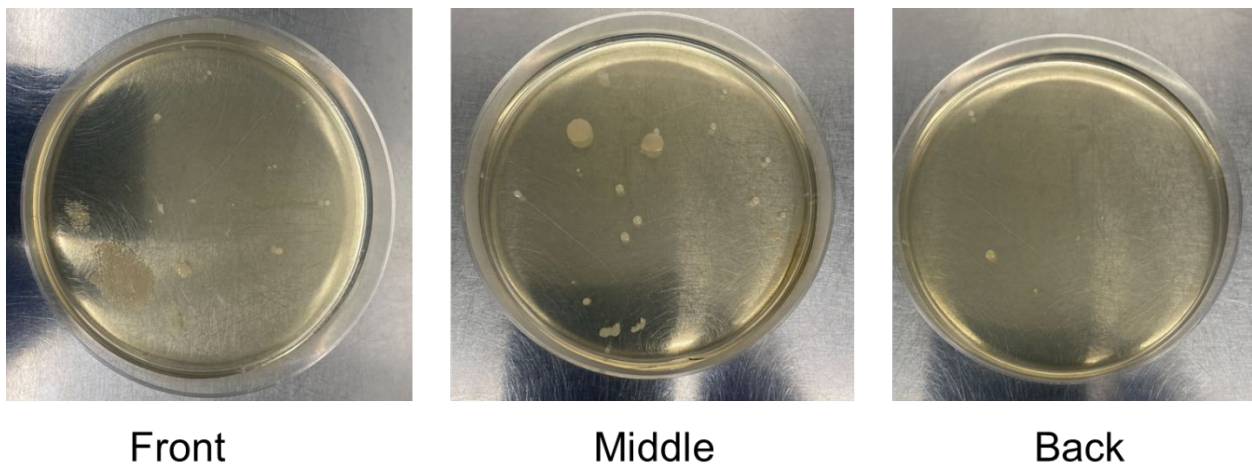

**Figure S2.** Example bacterial growth plates from the front, middle, and back of the lecture hall.

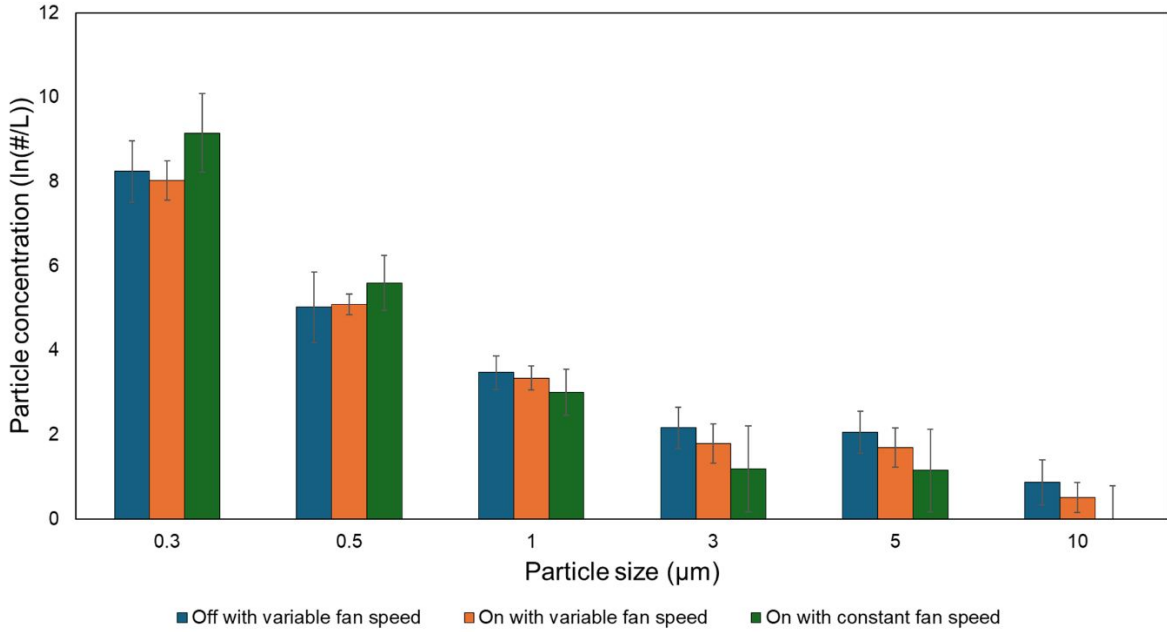

**Figure S3.** Particle number concentrations by size, log transformed. The size shown is the lower bound of the range measured.

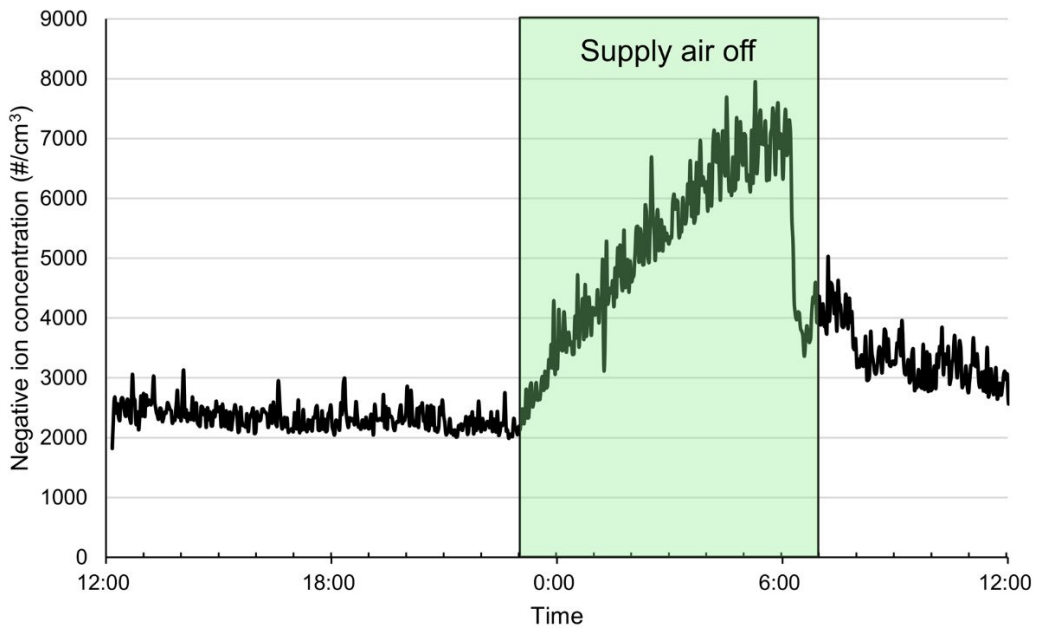

**Figure S4.** Negative ion concentrations increased at nighttime when the supply air was off.

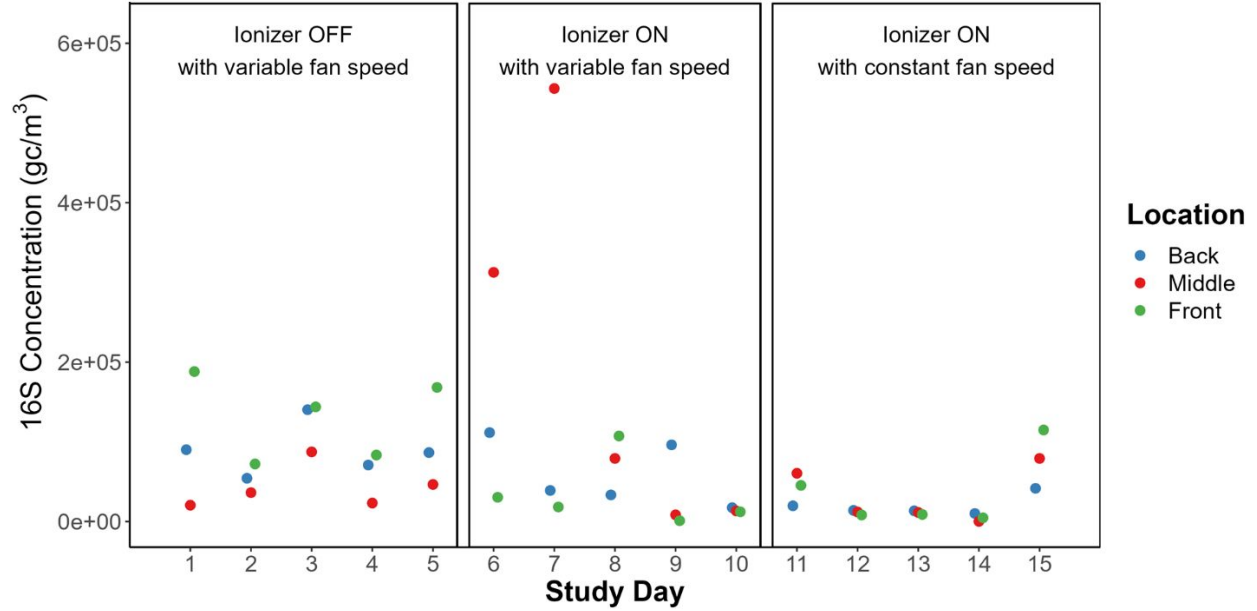

**Figure S5.** 16S rRNA gene copy concentrations plotted on a linear scale.

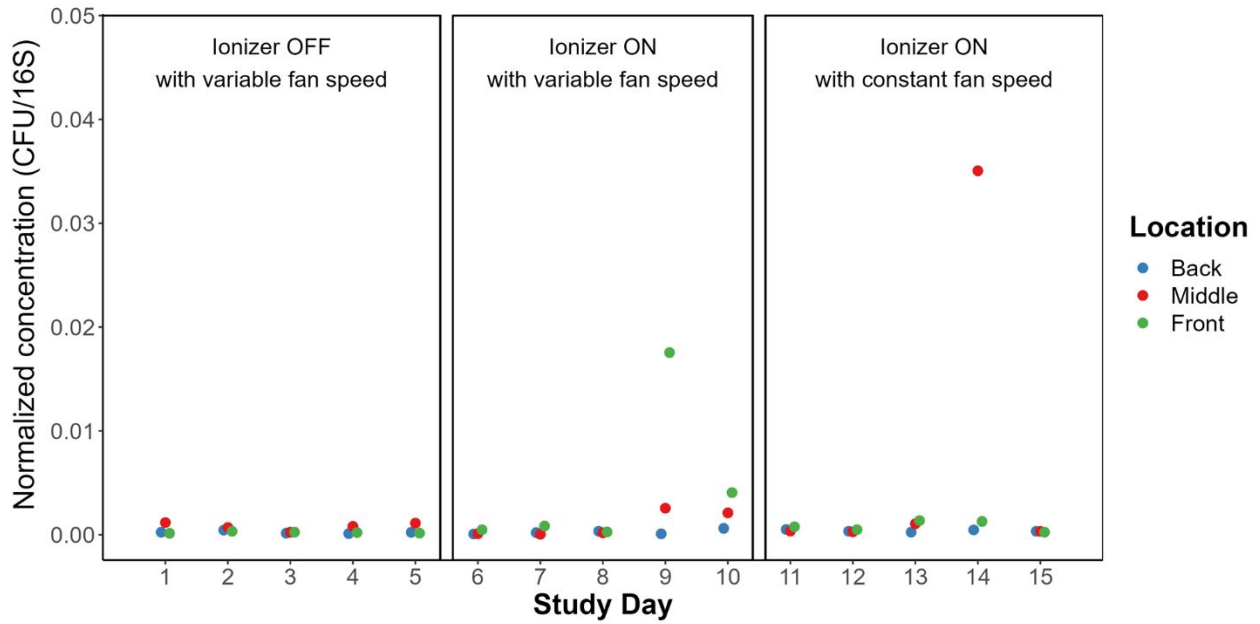

**Figure S6.** Normalized bacteria concentrations (CFU per 16S rRNA gene copy) plotted on a linear scale.

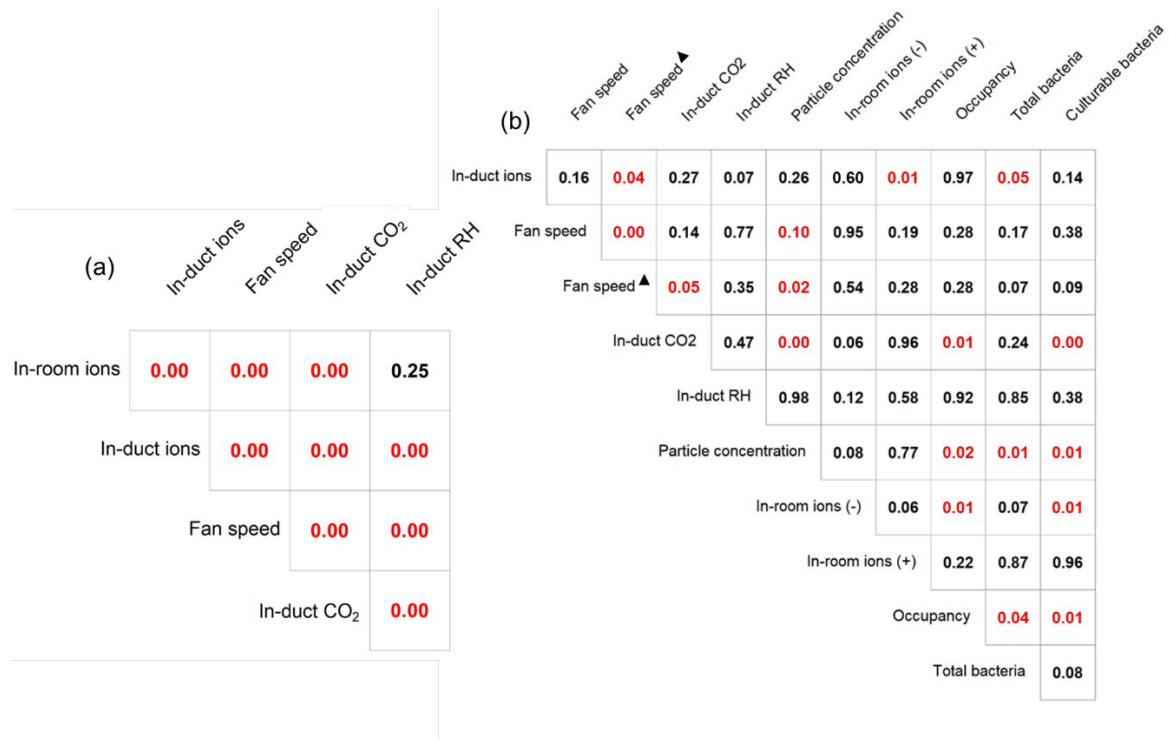

**Figure S7.** p-values for correlation plots for variables measured (a) continuously and (b) only during the 1-hour sampling period. Total bacteria are quantified in terms of 16S rRNA gene copies. Triangle (▲) denotes measurements from the hour before sampling. In-duct ion measurements may represent positive or negative ions or both.

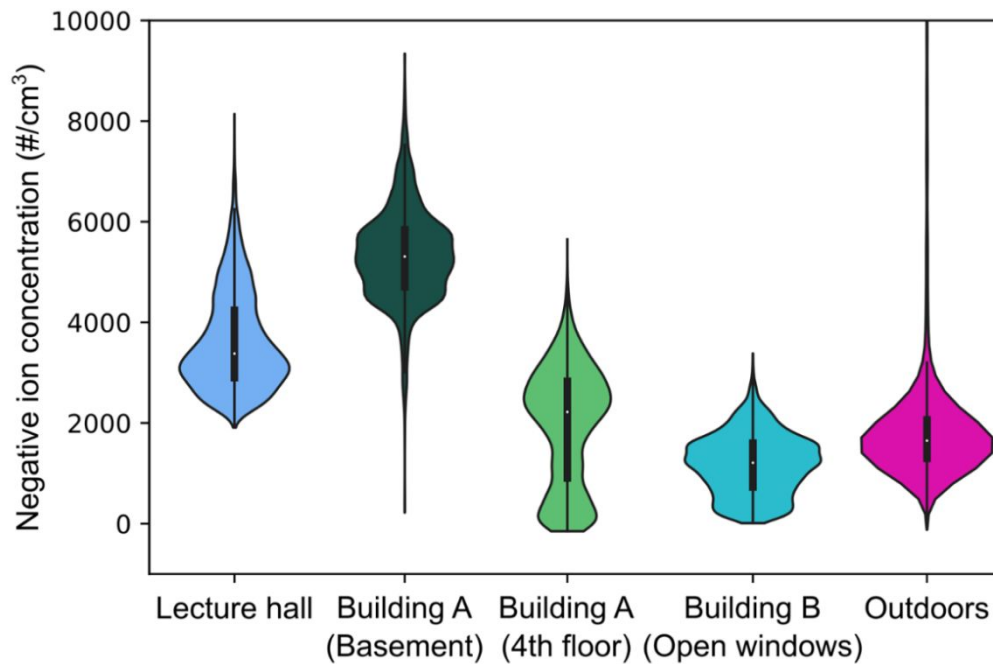

**Figure S8.** Negative ion concentrations in other rooms and buildings, including a basement, a fourth-floor classroom, a ground-level room with open windows, and an outdoor setting.
